# Supplementary material for: Understanding the kinetics of thermal decomposition of 2,3-epoxy-2,3-dimethylbutane using RRKM theory
Source: Royal Society of Chemistry journal article supplement (doi:10.1039/c6ra21963b), 2016-01-01
Supplement: c6ra21963b1.pdf [file c6ra21963b1.pdf]

## Understanding the kinetics of thermal decomposition of 2,3-epoxy-2,3-dimethylbutane using RRKM theory

Abolfazl Shiroudi<sup>a,b,\*</sup>, Ehsan Zahedi<sup>c</sup>

<sup>a</sup> Center of Molecular and Materials Modelling, Hasselt University, Agoralaan, Gebouw D, B-3590 Diepenbeek, Belgium

<sup>b</sup> Young Researchers and Elite Club, East Tehran Branch, Islamic Azad University, Tehran, Iran

<sup>c</sup> Chemistry Department, Shahrood Branch, Islamic Azad University, Shahrood, Iran

### Electronic Supplementary Information

**Table S1:** Unimolecular rate constants for all reaction steps involved in the reported chemical pathways (results obtained by means of RRKM theory at different pressures and temperatures, according to the computed UM06-2x/aug-cc-pVTZ energy profiles).

**Table S1a:** [ $T = 661.5$  K]

| $P$ (bar) | $k_{\text{uni}}$<br>(R→P1) | $k_{\text{uni}}$<br>(R→P3) | $k_{\text{uni}}$<br>(R→P2) | $\log P$ | $\log k_{\text{uni}}$<br>(R→P1) | $\log k_{\text{uni}}$<br>(R→P3) | $\log k_{\text{uni}}$<br>(R→P2) |
|-----------|----------------------------|----------------------------|----------------------------|----------|---------------------------------|---------------------------------|---------------------------------|
| 1.00E+02  | 1.83E-07                   | 7.82E-07                   | 6.60E-10                   | 2        | -6.74                           | -6.11                           | -9.18                           |
| 1.00E+00  | 1.83E-07                   | 7.82E-07                   | 6.60E-10                   | 0        | -6.74                           | -6.11                           | -9.18                           |
| 1.00E-02  | 1.83E-07                   | 7.82E-07                   | 6.60E-10                   | -2       | -6.74                           | -6.11                           | -9.18                           |
| 1.00E-04  | 1.83E-07                   | 7.82E-07                   | 6.60E-10                   | -4       | -6.74                           | -6.11                           | -9.18                           |
| 1.00E-06  | 1.77E-07                   | 7.42E-07                   | 6.58E-10                   | -6       | -6.75                           | -6.13                           | -9.18                           |
| 1.00E-08  | 1.16E-07                   | 4.42E-07                   | 5.95E-10                   | -8       | -6.94                           | -6.35                           | -9.23                           |
| 1.00E-10  | 2.87E-08                   | 9.41E-08                   | 2.99E-10                   | -10      | -7.54                           | -7.03                           | -9.52                           |
| 1.00E-12  | 2.55E-09                   | 7.33E-09                   | 5.52E-11                   | -12      | -8.59                           | -8.13                           | -10.26                          |

**Table S1b:** [ $T = 672.2$  K]

| $P$ (bar) | $k_{\text{uni}}$<br>(R→P1) | $k_{\text{uni}}$<br>(R→P3) | $k_{\text{uni}}$<br>(R→P2) | $\log P$ | $\log k_{\text{uni}}$<br>(R→P1) | $\log k_{\text{uni}}$<br>(R→P3) | $\log k_{\text{uni}}$<br>(R→P2) |
|-----------|----------------------------|----------------------------|----------------------------|----------|---------------------------------|---------------------------------|---------------------------------|
| 1.00E+02  | 3.73E-07                   | 1.55E-06                   | 1.44E-09                   | 2        | -6.43                           | -5.81                           | -8.84                           |
| 1.00E+00  | 3.73E-07                   | 1.55E-06                   | 1.44E-09                   | 0        | -6.43                           | -5.81                           | -8.84                           |
| 1.00E-02  | 3.73E-07                   | 1.55E-06                   | 1.44E-09                   | -2       | -6.43                           | -5.81                           | -8.84                           |
| 1.00E-04  | 3.73E-07                   | 1.55E-06                   | 1.44E-09                   | -4       | -6.43                           | -5.81                           | -8.84                           |
| 1.00E-06  | 3.57E-07                   | 1.46E-06                   | 1.44E-09                   | -6       | -6.45                           | -5.84                           | -8.84                           |
| 1.00E-08  | 2.24E-07                   | 8.30E-07                   | 1.28E-09                   | -8       | -6.65                           | -6.08                           | -8.89                           |
| 1.00E-10  | 5.21E-08                   | 1.65E-07                   | 6.10E-10                   | -10      | -7.28                           | -6.78                           | -9.21                           |
| 1.00E-12  | 4.39E-09                   | 1.22E-08                   | 1.06E-10                   | -12      | -8.36                           | -7.91                           | -9.97                           |

\* Corresponding author: E-mails: abolfazl.shiroudi@uhasselt.be (A. Shiroudi)

**Table S1c:** [ $T = 681.1$  K]

| $P$ (bar) | $k_{\text{uni}}$<br>(R→P1) | $k_{\text{uni}}$<br>(R→P3) | $k_{\text{uni}}$<br>(R→P2) | $\log P$ | $\log k_{\text{uni}}$<br>(R→P1) | $\log k_{\text{uni}}$<br>(R→P3) | $\log k_{\text{uni}}$<br>(R→P2) |
|-----------|----------------------------|----------------------------|----------------------------|----------|---------------------------------|---------------------------------|---------------------------------|
| 1.00E+02  | 6.62E-07                   | 2.70E-06                   | 2.72E-09                   | 2        | -6.18                           | -5.57                           | -8.57                           |
| 1.00E+00  | 6.62E-07                   | 2.70E-06                   | 2.72E-09                   | 0        | -6.18                           | -5.57                           | -8.57                           |
| 1.00E-02  | 6.62E-07                   | 2.70E-06                   | 2.72E-09                   | -2       | -6.18                           | -5.57                           | -8.57                           |
| 1.00E-04  | 6.61E-07                   | 2.70E-06                   | 2.72E-09                   | -4       | -6.18                           | -5.57                           | -8.57                           |
| 1.00E-06  | 6.30E-07                   | 2.52E-06                   | 2.71E-09                   | -6       | -6.20                           | -5.60                           | -8.57                           |
| 1.00E-08  | 3.81E-07                   | 1.37E-06                   | 2.38E-09                   | -8       | -6.42                           | -5.86                           | -8.62                           |
| 1.00E-10  | 8.40E-08                   | 2.59E-07                   | 1.08E-09                   | -10      | -7.08                           | -6.59                           | -8.97                           |
| 1.00E-12  | 6.76E-09                   | 1.83E-08                   | 1.78E-10                   | -12      | -8.17                           | -7.74                           | -9.75                           |

**Table S1d:** [ $T = 689.1$  K]

| $P$ (bar) | $k_{\text{uni}}$<br>(R→P1) | $k_{\text{uni}}$<br>(R→P3) | $k_{\text{uni}}$<br>(R→P2) | $\log P$ | $\log k_{\text{uni}}$<br>(R→P1) | $\log k_{\text{uni}}$<br>(R→P3) | $\log k_{\text{uni}}$<br>(R→P2) |
|-----------|----------------------------|----------------------------|----------------------------|----------|---------------------------------|---------------------------------|---------------------------------|
| 1.00E+02  | 1.09E-06                   | 4.39E-06                   | 4.73E-09                   | 2        | -5.96                           | -5.36                           | -8.33                           |
| 1.00E+00  | 1.09E-06                   | 4.39E-06                   | 4.73E-09                   | 0        | -5.96                           | -5.36                           | -8.33                           |
| 1.00E-02  | 1.09E-06                   | 4.39E-06                   | 4.73E-09                   | -2       | -5.96                           | -5.36                           | -8.33                           |
| 1.00E-04  | 1.09E-06                   | 4.38E-06                   | 4.73E-09                   | -4       | -5.96                           | -5.36                           | -8.33                           |
| 1.00E-06  | 1.04E-06                   | 4.05E-06                   | 4.71E-09                   | -6       | -5.98                           | -5.39                           | -8.33                           |
| 1.00E-08  | 6.07E-07                   | 2.14E-06                   | 4.08E-09                   | -8       | -6.22                           | -5.67                           | -8.39                           |
| 1.00E-10  | 1.27E-07                   | 3.84E-07                   | 1.78E-09                   | -10      | -6.90                           | -6.42                           | -8.75                           |
| 1.00E-12  | 9.85E-09                   | 2.61E-08                   | 2.81E-10                   | -12      | -8.01                           | -7.58                           | -9.55                           |

**Table S1e:** [ $T = 696.3$  K]

| $P$ (bar) | $k_{\text{uni}}$<br>(R→P1) | $k_{\text{uni}}$<br>(R→P3) | $k_{\text{uni}}$<br>(R→P2) | $\log P$ | $\log k_{\text{uni}}$<br>(R→P1) | $\log k_{\text{uni}}$<br>(R→P3) | $\log k_{\text{uni}}$<br>(R→P2) |
|-----------|----------------------------|----------------------------|----------------------------|----------|---------------------------------|---------------------------------|---------------------------------|
| 1.00E+02  | 1.71E-06                   | 6.73E-06                   | 7.72E-09                   | 2        | -5.77                           | -5.17                           | -8.11                           |
| 1.00E+00  | 1.71E-06                   | 6.73E-06                   | 7.72E-09                   | 0        | -5.77                           | -5.17                           | -8.11                           |
| 1.00E-02  | 1.71E-06                   | 6.73E-06                   | 7.72E-09                   | -2       | -5.77                           | -5.17                           | -8.11                           |
| 1.00E-04  | 1.70E-06                   | 6.71E-06                   | 7.71E-09                   | -4       | -5.77                           | -5.17                           | -8.11                           |
| 1.00E-06  | 1.60E-06                   | 6.16E-06                   | 7.67E-09                   | -6       | -5.80                           | -5.21                           | -8.12                           |
| 1.00E-08  | 9.11E-07                   | 3.14E-06                   | 6.56E-09                   | -8       | -6.04                           | -5.50                           | -8.18                           |
| 1.00E-10  | 1.83E-07                   | 5.41E-07                   | 2.76E-09                   | -10      | -6.74                           | -6.27                           | -8.56                           |
| 1.00E-12  | 1.37E-08                   | 3.55E-08                   | 4.17E-10                   | -12      | -7.86                           | -7.45                           | -9.38                           |

**Table S1f:** [ $T = 704.2$  K]

| $P$ (bar) | $k_{\text{uni}}$<br>(R→P1) | $k_{\text{uni}}$<br>(R→P3) | $k_{\text{uni}}$<br>(R→P2) | $\log P$ | $\log k_{\text{uni}}$<br>(R→P1) | $\log k_{\text{uni}}$<br>(R→P3) | $\log k_{\text{uni}}$<br>(R→P2) |
|-----------|----------------------------|----------------------------|----------------------------|----------|---------------------------------|---------------------------------|---------------------------------|
| 1.00E+02  | 2.75E-06                   | 1.07E-05                   | 1.30E-08                   | 2        | -5.56                           | -4.97                           | -7.89                           |
| 1.00E+00  | 2.75E-06                   | 1.07E-05                   | 1.30E-08                   | 0        | -5.56                           | -4.97                           | -7.89                           |
| 1.00E-02  | 2.75E-06                   | 1.07E-05                   | 1.30E-08                   | -2       | -5.56                           | -4.97                           | -7.89                           |
| 1.00E-04  | 2.74E-06                   | 1.06E-05                   | 1.30E-08                   | -4       | -5.56                           | -4.97                           | -7.89                           |
| 1.00E-06  | 2.56E-06                   | 9.66E-06                   | 1.29E-08                   | -6       | -5.59                           | -5.02                           | -7.89                           |
| 1.00E-08  | 1.41E-06                   | 4.74E-06                   | 1.09E-08                   | -8       | -5.85                           | -5.32                           | -7.96                           |
| 1.00E-10  | 2.70E-07                   | 7.79E-07                   | 4.41E-09                   | -10      | -6.57                           | -6.11                           | -8.36                           |
| 1.00E-12  | 1.94E-08                   | 4.93E-08                   | 6.37E-10                   | -12      | -7.71                           | -7.31                           | -9.20                           |

**Table S1g:** [ $T = 713.2$  K]

| $P$ (bar) | $k_{\text{uni}}$<br>(R→P1) | $k_{\text{uni}}$<br>(R→P3) | $k_{\text{uni}}$<br>(R→P2) | $\log P$ | $\log k_{\text{uni}}$<br>(R→P1) | $\log k_{\text{uni}}$<br>(R→P3) | $\log k_{\text{uni}}$<br>(R→P2) |
|-----------|----------------------------|----------------------------|----------------------------|----------|---------------------------------|---------------------------------|---------------------------------|
| 1.00E+02  | 4.66E-06                   | 1.77E-05                   | 2.34E-08                   | 2        | -5.33                           | -4.75                           | -7.63                           |
| 1.00E+00  | 4.66E-06                   | 1.77E-05                   | 2.34E-08                   | 0        | -5.33                           | -4.75                           | -7.63                           |
| 1.00E-02  | 4.66E-06                   | 1.77E-05                   | 2.34E-08                   | -2       | -5.33                           | -4.75                           | -7.63                           |
| 1.00E-04  | 4.66E-06                   | 1.77E-05                   | 2.34E-08                   | -4       | -5.33                           | -4.75                           | -7.63                           |
| 1.00E-06  | 4.31E-06                   | 1.59E-05                   | 2.32E-08                   | -6       | -5.37                           | -4.80                           | -7.64                           |
| 1.00E-08  | 2.27E-06                   | 7.46E-06                   | 1.91E-08                   | -8       | -5.64                           | -5.13                           | -7.72                           |
| 1.00E-10  | 4.13E-07                   | 1.16E-06                   | 7.39E-09                   | -10      | -6.38                           | -5.93                           | -8.13                           |
| 1.00E-12  | 2.85E-08                   | 7.07E-08                   | 1.01E-09                   | -12      | -7.55                           | -7.15                           | -8.99                           |

**Table S1h:** [ $T = 721.2$  K]

| $P$ (bar) | $k_{\text{uni}}$<br>(R→P1) | $k_{\text{uni}}$<br>(R→P3) | $k_{\text{uni}}$<br>(R→P2) | $\log P$ | $\log k_{\text{uni}}$<br>(R→P1) | $\log k_{\text{uni}}$<br>(R→P3) | $\log k_{\text{uni}}$<br>(R→P2) |
|-----------|----------------------------|----------------------------|----------------------------|----------|---------------------------------|---------------------------------|---------------------------------|
| 1.00E+02  | 7.39E-06                   | 2.77E-05                   | 3.88E-08                   | 2.00     | -5.13                           | -4.56                           | -7.41                           |
| 1.00E+00  | 7.39E-06                   | 2.77E-05                   | 3.88E-08                   | 0.00     | -5.13                           | -4.56                           | -7.41                           |
| 1.00E-02  | 7.39E-06                   | 2.77E-05                   | 3.88E-08                   | -2.00    | -5.13                           | -4.56                           | -7.41                           |
| 1.00E-04  | 7.37E-06                   | 2.76E-05                   | 3.88E-08                   | -4.00    | -5.13                           | -4.56                           | -7.41                           |
| 1.00E-06  | 6.76E-06                   | 2.45E-05                   | 3.84E-08                   | -6.00    | -5.17                           | -4.61                           | -7.42                           |
| 1.00E-08  | 3.44E-06                   | 1.11E-05                   | 3.12E-08                   | -8.00    | -5.46                           | -4.95                           | -7.51                           |
| 1.00E-10  | 5.96E-07                   | 1.65E-06                   | 1.15E-08                   | -10.00   | -6.22                           | -5.78                           | -7.94                           |
| 1.00E-12  | 3.97E-08                   | 9.63E-08                   | 1.52E-09                   | -12.00   | -7.40                           | -7.02                           | -8.82                           |

**Table S1i:** [ $T = 729.1$  K]

| $P$ (bar) | $k_{\text{uni}}$<br>(R→P1) | $k_{\text{uni}}$<br>(R→P3) | $k_{\text{uni}}$<br>(R→P2) | $\log P$ | $\log k_{\text{uni}}$<br>(R→P1) | $\log k_{\text{uni}}$<br>(R→P3) | $\log k_{\text{uni}}$<br>(R→P2) |
|-----------|----------------------------|----------------------------|----------------------------|----------|---------------------------------|---------------------------------|---------------------------------|
| 1.00E+02  | 1.15E-05                   | 4.24E-05                   | 6.32E-08                   | 2.00     | -4.94                           | -4.37                           | -7.20                           |
| 1.00E+00  | 1.15E-05                   | 4.24E-05                   | 6.32E-08                   | 0.00     | -4.94                           | -4.37                           | -7.20                           |
| 1.00E-02  | 1.15E-05                   | 4.24E-05                   | 6.32E-08                   | -2.00    | -4.94                           | -4.37                           | -7.20                           |
| 1.00E-04  | 1.15E-05                   | 4.23E-05                   | 6.32E-08                   | -4.00    | -4.94                           | -4.37                           | -7.20                           |
| 1.00E-06  | 1.04E-05                   | 3.71E-05                   | 6.25E-08                   | -6.00    | -4.98                           | -4.43                           | -7.20                           |
| 1.00E-08  | 5.12E-06                   | 1.61E-05                   | 4.98E-08                   | -8.00    | -5.29                           | -4.79                           | -7.30                           |
| 1.00E-10  | 8.48E-07                   | 2.29E-06                   | 1.77E-08                   | -10.00   | -6.07                           | -5.64                           | -7.75                           |
| 1.00E-12  | 5.44E-08                   | 1.29E-07                   | 2.23E-09                   | -12.00   | -7.26                           | -6.89                           | -8.65                           |

**Table S2:** Kinetic rate constants (in  $\text{s}^{-1}$ ), and branching ratios in the reported chemical pathways at different pressures and temperatures using the RRKM theory, according to the computed UM06-2x/aug-cc-pVTZ energy profiles.**Table S2a:**

| Parameter<br>Temperature (K) | $P = 10^2$ bar                                                   |          |          |                         |        |        |
|------------------------------|------------------------------------------------------------------|----------|----------|-------------------------|--------|--------|
|                              | Unimolecular rate constant, $k_{\text{uni}}$ ( $\text{s}^{-1}$ ) |          |          | Branching ratio ( $R$ ) |        |        |
|                              | R → P1                                                           | R → P3   | R → P2   | $R(1)$                  | $R(3)$ | $R(2)$ |
| 661.5                        | 1.83E-07                                                         | 7.82E-07 | 6.60E-10 | 18.95                   | 80.98  | 0.07   |
| 672.2                        | 3.73E-07                                                         | 1.55E-06 | 1.44E-09 | 19.38                   | 80.54  | 0.07   |
| 681.1                        | 6.62E-07                                                         | 2.70E-06 | 2.72E-09 | 19.67                   | 80.24  | 0.08   |
| 689.1                        | 1.09E-06                                                         | 4.39E-06 | 4.73E-09 | 19.87                   | 80.04  | 0.09   |
| 696.3                        | 1.71E-06                                                         | 6.73E-06 | 7.72E-09 | 20.24                   | 79.67  | 0.09   |
| 704.2                        | 2.75E-06                                                         | 1.07E-05 | 1.30E-08 | 20.43                   | 79.48  | 0.10   |
| 713.2                        | 4.66E-06                                                         | 1.77E-05 | 2.34E-08 | 20.82                   | 79.08  | 0.10   |
| 721.2                        | 7.39E-06                                                         | 2.77E-05 | 3.88E-08 | 21.04                   | 78.85  | 0.11   |
| 729.1                        | 1.15E-05                                                         | 4.24E-05 | 6.32E-08 | 21.31                   | 78.57  | 0.12   |

**Table S2b:**

| Parameter<br>Temperature (K) | $P = 10^0$ bar                                                   |          |          |                         |        |        |
|------------------------------|------------------------------------------------------------------|----------|----------|-------------------------|--------|--------|
|                              | Unimolecular rate constant, $k_{\text{uni}}$ ( $\text{s}^{-1}$ ) |          |          | Branching ratio ( $R$ ) |        |        |
|                              | R → P1                                                           | R → P3   | R → P2   | $R(1)$                  | $R(3)$ | $R(2)$ |
| 661.5                        | 1.83E-07                                                         | 7.82E-07 | 6.60E-10 | 18.95                   | 80.98  | 0.07   |
| 672.2                        | 3.73E-07                                                         | 1.55E-06 | 1.44E-09 | 19.38                   | 80.54  | 0.07   |
| 681.1                        | 6.62E-07                                                         | 2.70E-06 | 2.72E-09 | 19.67                   | 80.24  | 0.08   |
| 689.1                        | 1.09E-06                                                         | 4.39E-06 | 4.73E-09 | 19.87                   | 80.04  | 0.09   |
| 696.3                        | 1.71E-06                                                         | 6.73E-06 | 7.72E-09 | 20.24                   | 79.67  | 0.09   |
| 704.2                        | 2.75E-06                                                         | 1.07E-05 | 1.30E-08 | 20.43                   | 79.48  | 0.10   |
| 713.2                        | 4.66E-06                                                         | 1.77E-05 | 2.34E-08 | 20.82                   | 79.08  | 0.10   |
| 721.2                        | 7.39E-06                                                         | 2.77E-05 | 3.88E-08 | 21.04                   | 78.85  | 0.11   |
| 729.1                        | 1.15E-05                                                         | 4.24E-05 | 6.32E-08 | 21.31                   | 78.57  | 0.12   |

**Table S2c:**

| Parameter       |       | $P = 10^{-2}$ bar                                                |                    |                    |                         |        |        |
|-----------------|-------|------------------------------------------------------------------|--------------------|--------------------|-------------------------|--------|--------|
|                 |       | Unimolecular rate constant, $k_{\text{uni}}$ ( $\text{s}^{-1}$ ) |                    |                    | Branching ratio ( $R$ ) |        |        |
|                 |       | R $\rightarrow$ P1                                               | R $\rightarrow$ P3 | R $\rightarrow$ P2 | $R(1)$                  | $R(3)$ | $R(2)$ |
| Temperature (K) |       |                                                                  |                    |                    |                         |        |        |
|                 | 661.5 | 1.83E-07                                                         | 7.82E-07           | 6.60E-10           | 18.95                   | 80.98  | 0.07   |
|                 | 672.2 | 3.73E-07                                                         | 1.55E-06           | 1.44E-09           | 19.38                   | 80.54  | 0.07   |
|                 | 681.1 | 6.62E-07                                                         | 2.70E-06           | 2.72E-09           | 19.67                   | 80.24  | 0.08   |
|                 | 689.1 | 1.09E-06                                                         | 4.39E-06           | 4.73E-09           | 19.87                   | 80.04  | 0.09   |
|                 | 696.3 | 1.71E-06                                                         | 6.73E-06           | 7.72E-09           | 20.24                   | 79.67  | 0.09   |
|                 | 704.2 | 2.75E-06                                                         | 1.07E-05           | 1.30E-08           | 20.43                   | 79.48  | 0.10   |
|                 | 713.2 | 4.66E-06                                                         | 1.77E-05           | 2.34E-08           | 20.82                   | 79.08  | 0.10   |
|                 | 721.2 | 7.39E-06                                                         | 2.77E-05           | 3.88E-08           | 21.04                   | 78.85  | 0.11   |
|                 | 729.1 | 1.15E-05                                                         | 4.24E-05           | 6.32E-08           | 21.31                   | 78.57  | 0.12   |

**Table S2d:**

| Parameter       |       | $P = 10^{-4}$ bar                                                |                    |                    |                         |        |        |
|-----------------|-------|------------------------------------------------------------------|--------------------|--------------------|-------------------------|--------|--------|
|                 |       | Unimolecular rate constant, $k_{\text{uni}}$ ( $\text{s}^{-1}$ ) |                    |                    | Branching ratio ( $R$ ) |        |        |
|                 |       | R $\rightarrow$ P1                                               | R $\rightarrow$ P3 | R $\rightarrow$ P2 | $R(1)$                  | $R(3)$ | $R(2)$ |
| Temperature (K) |       |                                                                  |                    |                    |                         |        |        |
|                 | 661.5 | 1.83E-07                                                         | 7.82E-07           | 6.60E-10           | 18.95                   | 80.98  | 0.07   |
|                 | 672.2 | 3.73E-07                                                         | 1.55E-06           | 1.44E-09           | 19.38                   | 80.54  | 0.07   |
|                 | 681.1 | 6.61E-07                                                         | 2.70E-06           | 2.72E-09           | 19.65                   | 80.27  | 0.08   |
|                 | 689.1 | 1.09E-06                                                         | 4.38E-06           | 4.73E-09           | 19.91                   | 80.00  | 0.09   |
|                 | 696.3 | 1.70E-06                                                         | 6.71E-06           | 7.71E-09           | 20.20                   | 79.71  | 0.09   |
|                 | 704.2 | 2.74E-06                                                         | 1.06E-05           | 1.30E-08           | 20.52                   | 79.38  | 0.10   |
|                 | 713.2 | 4.66E-06                                                         | 1.77E-05           | 2.34E-08           | 20.82                   | 79.08  | 0.10   |
|                 | 721.2 | 7.37E-06                                                         | 2.76E-05           | 3.88E-08           | 21.05                   | 78.84  | 0.11   |
|                 | 729.1 | 1.15E-05                                                         | 4.23E-05           | 6.32E-08           | 21.35                   | 78.53  | 0.12   |

**Table S2e:**

| Parameter       |       | $P = 10^{-6}$ bar                                                |                    |                    |                         |        |        |
|-----------------|-------|------------------------------------------------------------------|--------------------|--------------------|-------------------------|--------|--------|
|                 |       | Unimolecular rate constant, $k_{\text{uni}}$ ( $\text{s}^{-1}$ ) |                    |                    | Branching ratio ( $R$ ) |        |        |
|                 |       | R $\rightarrow$ P1                                               | R $\rightarrow$ P3 | R $\rightarrow$ P2 | $R(1)$                  | $R(3)$ | $R(2)$ |
| Temperature (K) |       |                                                                  |                    |                    |                         |        |        |
|                 | 661.5 | 1.77E-07                                                         | 7.42E-07           | 6.58E-10           | 19.25                   | 80.68  | 0.07   |
|                 | 672.2 | 3.57E-07                                                         | 1.46E-06           | 1.44E-09           | 19.63                   | 80.29  | 0.08   |
|                 | 681.1 | 6.30E-07                                                         | 2.52E-06           | 2.71E-09           | 19.98                   | 79.93  | 0.09   |
|                 | 689.1 | 1.04E-06                                                         | 4.05E-06           | 4.71E-09           | 20.41                   | 79.49  | 0.09   |
|                 | 696.3 | 1.60E-06                                                         | 6.16E-06           | 7.67E-09           | 20.60                   | 79.30  | 0.10   |
|                 | 704.2 | 2.56E-06                                                         | 9.66E-06           | 1.29E-08           | 20.93                   | 78.97  | 0.11   |
|                 | 713.2 | 4.31E-06                                                         | 1.59E-05           | 2.32E-08           | 21.30                   | 78.58  | 0.11   |
|                 | 721.2 | 6.76E-06                                                         | 2.45E-05           | 3.84E-08           | 21.60                   | 78.28  | 0.12   |
|                 | 729.1 | 1.04E-05                                                         | 3.71E-05           | 6.25E-08           | 21.87                   | 78.00  | 0.13   |

**Table S2f:**

| Parameter       |       | $P = 10^{-8}$ bar                                                |                    |                    |                         |        |        |
|-----------------|-------|------------------------------------------------------------------|--------------------|--------------------|-------------------------|--------|--------|
|                 |       | Unimolecular rate constant, $k_{\text{uni}}$ ( $\text{s}^{-1}$ ) |                    |                    | Branching ratio ( $R$ ) |        |        |
|                 |       | R $\rightarrow$ P1                                               | R $\rightarrow$ P3 | R $\rightarrow$ P2 | $R(1)$                  | $R(3)$ | $R(2)$ |
| Temperature (K) |       |                                                                  |                    |                    |                         |        |        |
|                 | 661.5 | 1.16E-07                                                         | 4.42E-07           | 5.95E-10           | 20.77                   | 79.13  | 0.11   |
|                 | 672.2 | 2.24E-07                                                         | 8.30E-07           | 1.28E-09           | 21.23                   | 78.65  | 0.12   |
|                 | 681.1 | 3.81E-07                                                         | 1.37E-06           | 2.38E-09           | 21.73                   | 78.13  | 0.14   |
|                 | 689.1 | 6.07E-07                                                         | 2.14E-06           | 4.08E-09           | 22.06                   | 77.79  | 0.15   |
|                 | 696.3 | 9.11E-07                                                         | 3.14E-06           | 6.56E-09           | 22.45                   | 77.39  | 0.16   |
|                 | 704.2 | 1.41E-06                                                         | 4.74E-06           | 1.09E-08           | 22.89                   | 76.94  | 0.18   |
|                 | 713.2 | 2.27E-06                                                         | 7.46E-06           | 1.91E-08           | 23.28                   | 76.52  | 0.20   |
|                 | 721.2 | 3.44E-06                                                         | 1.11E-05           | 3.12E-08           | 23.61                   | 76.18  | 0.21   |
|                 | 729.1 | 5.12E-06                                                         | 1.61E-05           | 4.98E-08           | 24.07                   | 75.69  | 0.23   |

**Table S2g:**

| Parameter       |       | $P = 10^{-10}$ bar                                               |                    |                    |                         |        |        |
|-----------------|-------|------------------------------------------------------------------|--------------------|--------------------|-------------------------|--------|--------|
|                 |       | Unimolecular rate constant, $k_{\text{uni}}$ ( $\text{s}^{-1}$ ) |                    |                    | Branching ratio ( $R$ ) |        |        |
|                 |       | R $\rightarrow$ P1                                               | R $\rightarrow$ P3 | R $\rightarrow$ P2 | $R(1)$                  | $R(3)$ | $R(2)$ |
| Temperature (K) |       |                                                                  |                    |                    |                         |        |        |
|                 | 661.5 | 2.87E-08                                                         | 9.41E-08           | 2.99E-10           | 23.31                   | 76.44  | 0.24   |
|                 | 672.2 | 5.21E-08                                                         | 1.65E-07           | 6.10E-10           | 23.93                   | 75.79  | 0.28   |
|                 | 681.1 | 8.40E-08                                                         | 2.59E-07           | 1.08E-09           | 24.41                   | 75.27  | 0.31   |
|                 | 689.1 | 1.27E-07                                                         | 3.84E-07           | 1.78E-09           | 24.77                   | 74.89  | 0.35   |
|                 | 696.3 | 1.83E-07                                                         | 5.41E-07           | 2.76E-09           | 25.18                   | 74.44  | 0.38   |
|                 | 704.2 | 2.70E-07                                                         | 7.79E-07           | 4.41E-09           | 25.63                   | 73.95  | 0.42   |
|                 | 713.2 | 4.13E-07                                                         | 1.16E-06           | 7.39E-09           | 26.13                   | 73.40  | 0.47   |
|                 | 721.2 | 5.96E-07                                                         | 1.65E-06           | 1.15E-08           | 26.40                   | 73.09  | 0.51   |
|                 | 729.1 | 8.48E-07                                                         | 2.29E-06           | 1.77E-08           | 26.87                   | 72.57  | 0.56   |

**Table S2h:**

| Parameter       |       | $P = 10^{-12}$ bar                                               |                    |                    |                         |        |        |
|-----------------|-------|------------------------------------------------------------------|--------------------|--------------------|-------------------------|--------|--------|
|                 |       | Unimolecular rate constant, $k_{\text{uni}}$ ( $\text{s}^{-1}$ ) |                    |                    | Branching ratio ( $R$ ) |        |        |
|                 |       | R $\rightarrow$ P1                                               | R $\rightarrow$ P3 | R $\rightarrow$ P2 | $R(1)$                  | $R(3)$ | $R(2)$ |
| Temperature (K) |       |                                                                  |                    |                    |                         |        |        |
|                 | 661.5 | 2.55E-09                                                         | 7.33E-09           | 5.52E-11           | 25.67                   | 73.78  | 0.56   |
|                 | 672.2 | 4.39E-09                                                         | 1.22E-08           | 1.06E-10           | 26.29                   | 73.07  | 0.63   |
|                 | 681.1 | 6.76E-09                                                         | 1.83E-08           | 1.78E-10           | 26.79                   | 72.51  | 0.71   |
|                 | 689.1 | 1.04E-05                                                         | 3.71E-05           | 6.25E-08           | 21.87                   | 78.00  | 0.13   |
|                 | 696.3 | 1.37E-08                                                         | 3.55E-08           | 4.17E-10           | 27.61                   | 71.55  | 0.84   |
|                 | 704.2 | 1.94E-08                                                         | 4.93E-08           | 6.37E-10           | 27.98                   | 71.10  | 0.92   |
|                 | 713.2 | 2.85E-08                                                         | 7.07E-08           | 1.01E-09           | 28.44                   | 70.55  | 1.01   |
|                 | 721.2 | 3.97E-08                                                         | 9.63E-08           | 1.52E-09           | 28.87                   | 70.03  | 1.11   |
|                 | 729.1 | 5.44E-08                                                         | 1.29E-07           | 2.23E-09           | 29.31                   | 69.49  | 1.20   |

**Table S3:** Dependence upon the pressure and temperature of the regioselectivities  $[RSI= R(3)-[R(1)+R(2)]/R(1)+R(2)+R(3)]$  of thermal decomposition of 2,3-epoxy-2,3-dimethylbutane, according to the RRKM estimates of unimolecular rate constants  $[k_{uni}(1), k_{uni}(2), k_{uni}(3)]$  based on UM06-2x/aug-cc-pVTZ energy profiles.

**Table S3a:**  $[T= 661.5 \text{ K}]$

| $P$ (bar) | $k_{uni}(1)$ | $k_{uni}(2)$ | $k_{uni}(3)$ | $k_{uni}$<br>[(1)+(3)+(2)] | $R(1)$ | $R(2)$ | $R(3)$ | $\log P$ | $\{R(3)-[R(1)+R(2)]\}$<br>/ $[R(1)+R(1)+R(3)]$ |
|-----------|--------------|--------------|--------------|----------------------------|--------|--------|--------|----------|------------------------------------------------|
| 1.00E+02  | 1.83E-07     | 6.60E-10     | 7.82E-07     | 9.66E-07                   | 18.96  | 0.07   | 80.97  | 2        | 0.6195                                         |
| 1.00E+00  | 1.83E-07     | 6.60E-10     | 7.82E-07     | 9.66E-07                   | 18.96  | 0.07   | 80.97  | 0        | 0.6195                                         |
| 1.00E-02  | 1.83E-07     | 6.60E-10     | 7.82E-07     | 9.66E-07                   | 18.96  | 0.07   | 80.97  | -2       | 0.6195                                         |
| 1.00E-04  | 1.83E-07     | 6.60E-10     | 7.82E-07     | 9.65E-07                   | 18.96  | 0.07   | 80.97  | -4       | 0.6194                                         |
| 1.00E-06  | 1.77E-07     | 6.58E-10     | 7.42E-07     | 9.19E-07                   | 19.21  | 0.07   | 80.72  | -6       | 0.6144                                         |
| 1.00E-08  | 1.16E-07     | 5.95E-10     | 4.42E-07     | 5.58E-07                   | 20.70  | 0.11   | 79.20  | -8       | 0.5839                                         |
| 1.00E-10  | 2.87E-08     | 2.99E-10     | 9.41E-08     | 1.23E-07                   | 23.32  | 0.24   | 76.44  | -10      | 0.5287                                         |
| 1.00E-12  | 2.55E-09     | 5.52E-11     | 7.33E-09     | 9.94E-09                   | 25.67  | 0.55   | 73.78  | -12      | 0.4755                                         |

**Table S3b:**  $[T= 681.1 \text{ K}]$

| $P$ (bar) | $k_{uni}(1)$ | $k_{uni}(2)$ | $k_{uni}(3)$ | $k_{uni}$<br>[(1)+(3)+(2)] | $R(1)$ | $R(2)$ | $R(3)$ | $\log P$ | $\{R(3)-[R(1)+R(2)]\}$<br>/ $[R(1)+R(1)+R(3)]$ |
|-----------|--------------|--------------|--------------|----------------------------|--------|--------|--------|----------|------------------------------------------------|
| 1.00E+02  | 6.62E-07     | 2.72E-09     | 2.70E-06     | 3.36E-06                   | 19.67  | 0.08   | 80.25  | 2        | 0.6050                                         |
| 1.00E+00  | 6.62E-07     | 2.72E-09     | 2.70E-06     | 3.36E-06                   | 19.67  | 0.08   | 80.25  | 0        | 0.6050                                         |
| 1.00E-02  | 6.62E-07     | 2.72E-09     | 2.70E-06     | 3.36E-06                   | 19.67  | 0.08   | 80.25  | -2       | 0.6050                                         |
| 1.00E-04  | 6.61E-07     | 2.72E-09     | 2.70E-06     | 3.36E-06                   | 19.68  | 0.08   | 80.24  | -4       | 0.6048                                         |
| 1.00E-06  | 6.30E-07     | 2.71E-09     | 2.52E-06     | 3.15E-06                   | 20.01  | 0.09   | 79.91  | -6       | 0.5982                                         |
| 1.00E-08  | 3.81E-07     | 2.38E-09     | 1.37E-06     | 1.76E-06                   | 21.69  | 0.14   | 78.18  | -8       | 0.5635                                         |
| 1.00E-10  | 8.40E-08     | 1.08E-09     | 2.59E-07     | 3.45E-07                   | 24.39  | 0.31   | 75.30  | -10      | 0.5060                                         |
| 1.00E-12  | 6.76E-09     | 1.78E-10     | 1.83E-08     | 2.53E-08                   | 26.76  | 0.71   | 72.54  | -12      | 0.4508                                         |

**Table S3c:**  $[T= 696.3 \text{ K}]$

| $P$ (bar) | $k_{uni}(1)$ | $k_{uni}(2)$ | $k_{uni}(3)$ | $k_{uni}$<br>[(1)+(3)+(2)] | $R(1)$ | $R(2)$ | $R(3)$ | $\log P$ | $\{R(3)-[R(1)+R(2)]\}$<br>/ $[R(1)+R(1)+R(3)]$ |
|-----------|--------------|--------------|--------------|----------------------------|--------|--------|--------|----------|------------------------------------------------|
| 1.00E+02  | 1.71E-06     | 7.72E-09     | 6.73E-06     | 8.44E-06                   | 20.21  | 0.09   | 79.70  | 2        | 0.5940                                         |
| 1.00E+00  | 1.71E-06     | 7.72E-09     | 6.73E-06     | 8.44E-06                   | 20.21  | 0.09   | 79.70  | 0        | 0.5940                                         |
| 1.00E-02  | 1.71E-06     | 7.72E-09     | 6.73E-06     | 8.44E-06                   | 20.21  | 0.09   | 79.70  | -2       | 0.5940                                         |
| 1.00E-04  | 1.70E-06     | 7.71E-09     | 6.71E-06     | 8.43E-06                   | 20.22  | 0.09   | 79.69  | -4       | 0.5937                                         |
| 1.00E-06  | 1.60E-06     | 7.67E-09     | 6.16E-06     | 7.77E-06                   | 20.62  | 0.10   | 79.28  | -6       | 0.5857                                         |
| 1.00E-08  | 9.11E-07     | 6.56E-09     | 3.14E-06     | 4.06E-06                   | 22.45  | 0.16   | 77.39  | -8       | 0.5477                                         |
| 1.00E-10  | 1.83E-07     | 2.76E-09     | 5.41E-07     | 7.27E-07                   | 25.19  | 0.38   | 74.43  | -10      | 0.4885                                         |
| 1.00E-12  | 1.37E-08     | 4.17E-10     | 3.55E-08     | 4.96E-08                   | 27.57  | 0.84   | 71.59  | -12      | 0.4318                                         |

**Table S3d:** [ $T = 713.2$  K]

| $P$ (bar) | $k_{\text{uni}}$ (1) | $k_{\text{uni}}$ (2) | $k_{\text{uni}}$ (3) | $k_{\text{uni}}$ | $R$ (1) | $R$ (2) | $R$ (3) | $\log P$ | $\{R(3)-[R(1)+R(2)]\}$<br>/ $[R(1)+R(1)+R(3)]$ |
|-----------|----------------------|----------------------|----------------------|------------------|---------|---------|---------|----------|------------------------------------------------|
| 1.00E+02  | 4.66E-06             | 2.34E-08             | 1.77E-05             | 2.24E-05         | 20.79   | 0.10    | 79.11   | 2        | 0.5821                                         |
| 1.00E+00  | 4.66E-06             | 2.34E-08             | 1.77E-05             | 2.24E-05         | 20.79   | 0.10    | 79.11   | 0        | 0.5821                                         |
| 1.00E-02  | 4.66E-06             | 2.34E-08             | 1.77E-05             | 2.24E-05         | 20.79   | 0.10    | 79.11   | -2       | 0.5821                                         |
| 1.00E-04  | 4.66E-06             | 2.34E-08             | 1.77E-05             | 2.24E-05         | 20.81   | 0.10    | 79.09   | -4       | 0.5818                                         |
| 1.00E-06  | 4.31E-06             | 2.32E-08             | 1.59E-05             | 2.02E-05         | 21.30   | 0.11    | 78.59   | -6       | 0.5718                                         |
| 1.00E-08  | 2.27E-06             | 1.91E-08             | 7.46E-06             | 9.76E-06         | 23.29   | 0.20    | 76.51   | -8       | 0.5302                                         |
| 1.00E-10  | 4.13E-07             | 7.39E-09             | 1.16E-06             | 1.58E-06         | 26.06   | 0.47    | 73.47   | -10      | 0.4695                                         |
| 1.00E-12  | 2.85E-08             | 1.01E-09             | 7.07E-08             | 1.00E-07         | 28.45   | 1.01    | 70.54   | -12      | 0.4108                                         |

**Table S3e:** [ $T = 729.1$  K]

| $P$ (bar) | $k_{\text{uni}}$ (1) | $k_{\text{uni}}$ (2) | $k_{\text{uni}}$ (3) | $k_{\text{uni}}$ | $R$ (1) | $R$ (2) | $R$ (3) | $\log P$ | $\{R(3)-[R(1)+R(2)]\}$<br>/ $[R(1)+R(1)+R(3)]$ |
|-----------|----------------------|----------------------|----------------------|------------------|---------|---------|---------|----------|------------------------------------------------|
| 1.00E+02  | 1.15E-05             | 6.32E-08             | 4.24E-05             | 5.40E-05         | 21.32   | 0.12    | 78.56   | 2        | 0.5712                                         |
| 1.00E+00  | 1.15E-05             | 6.32E-08             | 4.24E-05             | 5.40E-05         | 21.32   | 0.12    | 78.56   | 0        | 0.5712                                         |
| 1.00E-02  | 1.15E-05             | 6.32E-08             | 4.24E-05             | 5.40E-05         | 21.32   | 0.12    | 78.56   | -2       | 0.5712                                         |
| 1.00E-04  | 1.15E-05             | 6.32E-08             | 4.23E-05             | 5.38E-05         | 21.35   | 0.12    | 78.54   | -4       | 0.5707                                         |
| 1.00E-06  | 1.04E-05             | 6.25E-08             | 3.71E-05             | 4.76E-05         | 21.93   | 0.13    | 77.94   | -6       | 0.5588                                         |
| 1.00E-08  | 5.12E-06             | 4.98E-08             | 1.61E-05             | 2.13E-05         | 24.08   | 0.23    | 75.69   | -8       | 0.5138                                         |
| 1.00E-10  | 8.48E-07             | 1.77E-08             | 2.29E-06             | 3.16E-06         | 26.85   | 0.56    | 72.59   | -10      | 0.4518                                         |
| 1.00E-12  | 5.44E-08             | 2.23E-09             | 1.29E-07             | 1.86E-07         | 29.24   | 1.20    | 69.56   | -12      | 0.3912                                         |
